# Supplementary material for: Core cross-linked double hydrophilic block copolymer micelles based on multiple hydrogen-bonding interactions
Source: Royal Society of Chemistry journal article supplement (doi:10.1039/c7py00210f), 2017-01-01
Supplement: c7py00210f1.pdf [file c7py00210f1.pdf]

## Supporting Information

### Core cross-linked double hydrophilic block copolymer micelles based on multiple hydrogen-bonding interactions

Jingsi Chen<sup>a</sup>, Bin Yan<sup>a,b</sup>, Xiaogang Wang<sup>c</sup>, Qingxue Huang<sup>c</sup>, Thomas Thundat<sup>a</sup>, Hongbo Zeng<sup>a,\*</sup>

<sup>a</sup> Department of Chemical and Materials Engineering, University of Alberta, Edmonton, Alberta, T6G 1H9, Canada. \*E-mail: [Hongbo.Zeng@ualberta.ca](mailto:Hongbo.Zeng@ualberta.ca); Fax: +1-780-492-2881; Tel: +1-780-492-1044

<sup>b</sup> College of Light Industry, Textile & Food Engineering, Sichuan University, Chengdu, 610065, China

<sup>c</sup> Material Science & Engineering Science College, Taiyuan University of Science and Technology, Taiyuan 030024, China

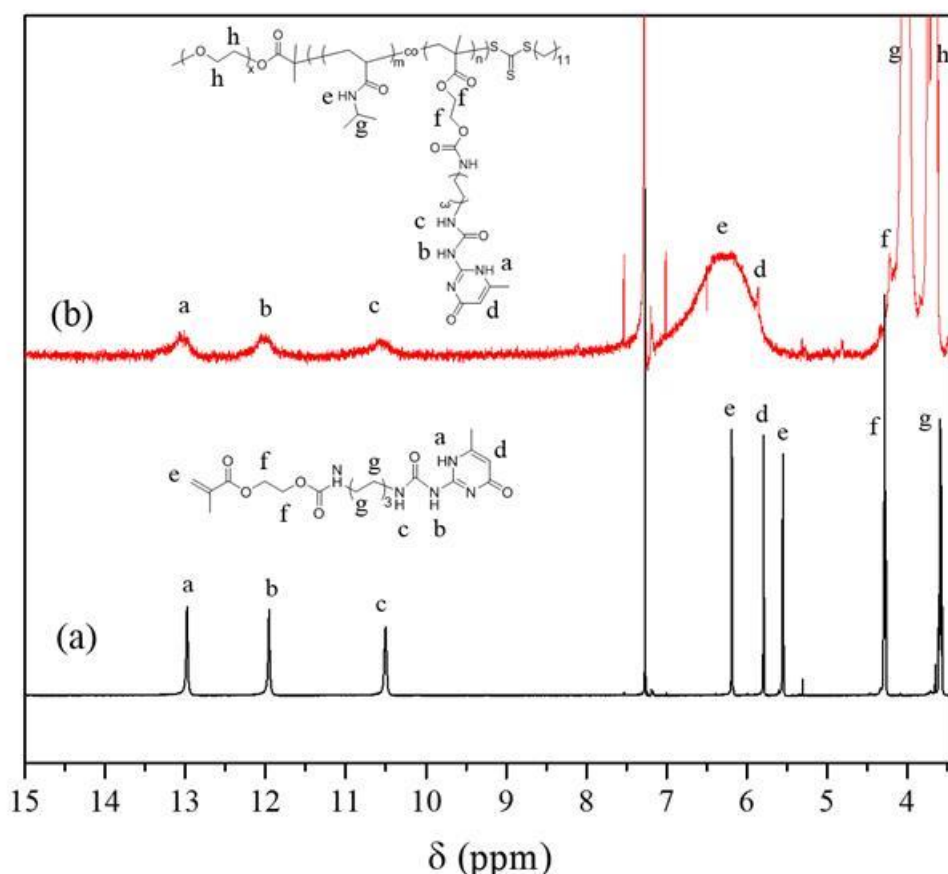

**Fig. S1** <sup>1</sup>H NMR spectra of (a) HEMA-UPY monomer and (b) BC-U6 diblock copolymer in CDCl<sub>3</sub>.

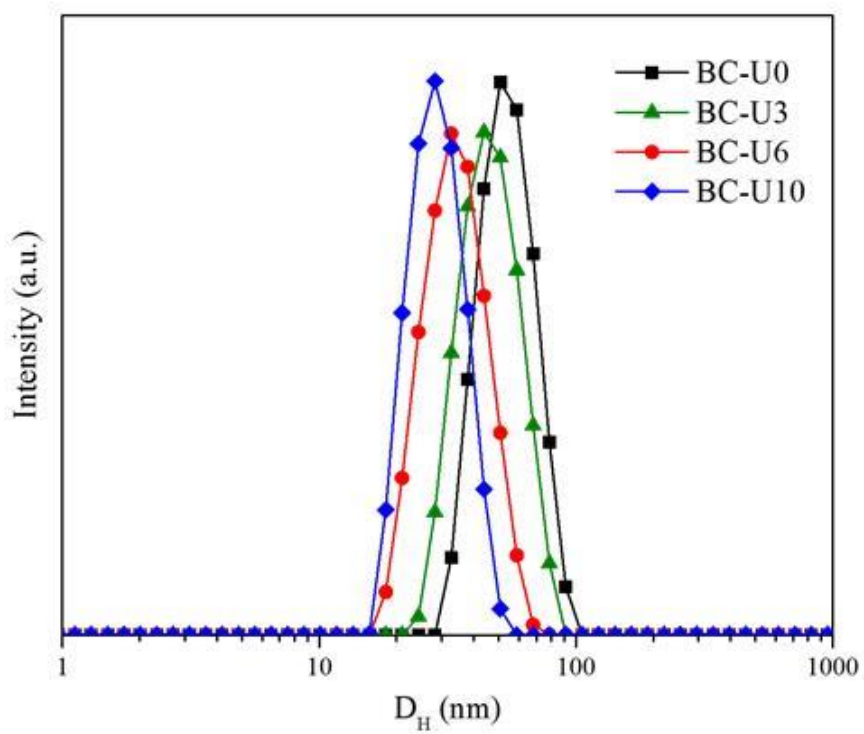

**Fig. S2** Hydrodynamic diameter distributions obtained from aqueous solutions of synthesized polymers BC-U0, BC-U3, BC-U6 and BC-U10 at 40 °C.
